1 **Title:** Unsupervised mining of HLA-I peptidomes reveals new binding motifs and substantial  
2 false positives in community database

3  
4 **Authors:** Chatchapon Sricharoensuk<sup>1</sup>, Tanupat Boonchalermvichien<sup>1</sup>, Phijitra Muanwien<sup>2</sup>,  
5 Poorichaya Somparn<sup>3</sup>, Trairak Pisitkun<sup>3,4</sup>, Sira Sriswasdi<sup>1,4,\*</sup>

6  
7 **Affiliations:**

8 <sup>1</sup> Computational Molecular Biology Group, Faculty of Medicine, Chulalongkorn University,  
9 Pathum Wan, Bangkok, Thailand 10330

10 <sup>2</sup> Medical Sciences, Faculty of Medicine, Chulalongkorn University, Pathum Wan, Bangkok,  
11 Thailand 10330

12 <sup>3</sup> Center of Excellence in Systems Biology, Faculty of Medicine, Chulalongkorn University,  
13 Pathum Wan, Bangkok, Thailand 10330

14 <sup>4</sup> Research Affairs, Faculty of Medicine, Chulalongkorn University, Pathum Wan, Bangkok,  
15 Thailand 10330

16 \* Correspondence may be addressed to Sira Sriswasdi (sira.sr@chula.ac.th)

17  
18 **Abstract**

19 Modern vaccine designs and studies of human leukocyte antigen (HLA)-mediated  
20 immune responses rely heavily on the knowledge of HLA allele-specific binding motifs and  
21 computational prediction of HLA-peptide binding affinity. Breakthroughs in HLA peptidomics  
22 have considerably expanded the databases of natural HLA ligands and enabled detailed  
23 characterizations of HLA-peptide binding specificity. However, cautions must be made when  
24 analyzing HLA peptidomics data because identified peptides may be contaminants in mass  
25 spectrometry or may weakly bind to the HLA molecules. Here, a hybrid *de novo* peptide  
26 sequencing approach was applied to large-scale mono-allelic HLA peptidomics datasets to  
27 uncover new ligands and refine current knowledge of HLA binding motifs. Up to 12-40% of the  
28 peptidomics data were low-binding affinity peptides with an arginine or a lysine at the C-  
29 terminus and likely to be tryptic peptide contaminants. Thousands of these peptides have been  
30 reported in a community database as legitimate ligands and might be erroneously used for  
31 training prediction models. Furthermore, unsupervised clustering of identified ligands revealed  
32 additional binding motifs for several HLA class I alleles and effectively isolated outliers that  
33 were experimentally confirmed to be false positives. Overall, our findings expanded the  
34 knowledge of HLA binding specificity and advocated for more rigorous interpretation of HLA  
35 peptidomics data that will ensure the high validity of community HLA ligandome databases.

36  
37 **Introduction**

38 Human leukocyte antigen (HLA) is a family of proteins in the immune system that binds  
39 to and presents peptide fragments of proteins expressed in the body for recognition by T cells.  
40 Peptides that form stable complexes with HLA proteins are also called HLA ligands. When a  
41 foreign antigen, whose amino acid sequence differs from the host's proteome, was intracellularly  
42 processed and presented on the cell surface by HLA proteins, the cell containing foreign antigen  
43 would be recognized T cell and subsequently destroyed by the immune system. Therefore, HLA-  
44 peptide binding activity has been extensively studied for medical and biotechnology applications  
45 in vaccine design and cancer immunotherapy<sup>1-6</sup>.

46 HLA class I is a subclass of the HLA system that recognizes peptides with 8-15 amino  
47 acids in length. The binding affinity of a peptide to an HLA class I molecule mainly depends on  
48 an 8- to 10-residue motif on the peptide including a few HLA allele-specific amino acid residues  
49 at anchor positions<sup>7-10</sup>. Other residues on the peptide are relatively unconstrained, but some  
50 amino acid combinations can affect the binding affinity. To date, although a few works have  
51 highlighted the multiple specificities of HLA class I binding<sup>8,11,12</sup> and HLA class II binding<sup>13</sup>, the  
52 motif of each HLA class I allele is still represented with a single amino acid frequency profile in  
53 major databases<sup>14,15</sup>. In other words, HLA class I motifs were assumed to be unimodal. While  
54 this simplification may not have a noticeable impact on the development of HLA binding  
55 prediction models<sup>11,16</sup>, it may limit the design landscape of vaccines if researchers use only the  
56 consensus motif as a guideline.

57 Breakthroughs in HLA peptidomics, which enabled the isolation of HLA proteins from  
58 the cell surface followed by high-throughput sequencing of HLA ligands, have cataloged a large  
59 amount of ligand sequences for a multitude of HLA class I and class II alleles from both cell  
60 lines and patient samples<sup>8,10,17,18</sup>. These data accelerated the improvement in HLA binding  
61 prediction accuracy as well as enabled detailed characterization of HLA binding specificity.  
62 HLA peptidomics is also being increasingly utilized to identify tumor-specific or tumor-elevated  
63 antigens in cancer patients, which can then be developed into a cancer vaccine to boost the  
64 immune system to target cancer cells<sup>5,6</sup>. Nonetheless, results from HLA peptidomics only  
65 indicate whether the peptides are bound to the HLA proteins and presented on the cell surface  
66 but provides no information on their actual binding affinities. Hence, downstream analyses of  
67 HLA peptidomics often involve HLA binding affinity predictions by artificial neural network  
68 models to screen for peptides with strong bindings. Furthermore, like most mass spectrometry  
69 analyses, results from HLA peptidomics can include contaminants such as carry-over peptides  
70 and non-HLA-specific proteolytic peptides or artifacts from in-source fragmentations<sup>19,20</sup>. A  
71 recent study has proposed additional analysis steps that would help reduce the number of  
72 contaminant identifications originating from these sources<sup>20</sup>.

73 Increasing the understanding of HLA binding specificity and the quality of known HLA  
74 ligand databases is crucial for designing better vaccines against constantly emerging pathogens  
75 and improving the accuracy of HLA binding and immunogenicity predictions. In this study, a  
76 hybrid *de novo* peptide sequencing strategy with SMSNet<sup>21</sup> was applied to large-scale HLA class  
77 I peptidomics datasets<sup>8,17</sup> to uncover new candidate HLA ligands that would expand the existing  
78 databases. Subsequent unsupervised clustering of known and newly discovered ligands for each  
79 HLA class I allele strongly suggested that several alleles recognize multiple, clearly distinct  
80 motifs. Many potential false positives whose sequences do not match the corresponding HLA  
81 binding motifs were also observed. A validation experiment confirmed that almost all potential  
82 false positives exhibit no HLA binding activity. Most importantly, many of these false positives  
83 were also found in the Immune Epitope Database<sup>15</sup> and could be erroneously used by the  
84 community. Additionally, our HLA peptidomics analysis of a B-lymphoblastoid cell line  
85 expressing both HLA class I and class II alleles highlighted the capability of *de novo* sequencing  
86 by SMSNet to identify high-affinity antigens in a multi-allelic setting.

87 Overall, our work revisited two key aspects of the HLA study: the representation of the  
88 HLA binding motif and the interpretation of HLA peptidomics data. The findings strongly  
89 suggested that the implicit unimodal assumption of HLA class I motifs should be replaced by a  
90 multimodal representation and that the quality of HLA peptidome-derived HLA-I ligands  
91 reported in the community database may be questioned.

## 92 **Results**

### 93 **Re-analysis of large-scale mono-allelic HLA class I peptidomes**

94 *De novo* peptide sequencing with SMSNet<sup>21</sup> was shown to be effective for discovering  
95 new candidate HLA class I antigens from a peptidomics dataset. Here, SMSNet was applied to a  
96 larger collection of high-quality HLA peptidomics data from mono-allelic human B  
97 lymphoblastoid cell lines encompassing 88 HLA-A, -B, -C, and -G alleles<sup>8,17</sup>. In total, 109,372  
98 unique peptide sequences with lengths ranging from 8 to 15 amino acids were identified from  
99 327,312 mass spectra (Figure 1a, Supplementary Table 1). There are 36,043 newly discovered  
100 peptide-HLA pairs involving 25,718 unique peptide sequences as well as 5,347 additional pairs  
101 that have been previously observed in multi-allelic patient samples. Over 88% (22,854 peptides)  
102 of newly discovered peptides could be mapped to the human reference proteome. About half of  
103 peptides with unknown origins could be traced to open reading frames on non-coding transcripts  
104 (1,630 peptides) and a small fraction could be explained by proteasome-mediated splicing (222  
105 peptides). However, it should be noted that 30% of hypothetical spliced peptides could also be  
106 alternatively explained by missense mutations and 45% of them might be erroneously attributed  
107 to splicing events (see Methods). The length distribution of newly identified peptides matches  
108 well with past observations<sup>22</sup>, with the majority being 9-mers (Figure 1b). Most importantly, the  
109 discovery of these new peptides has the potential to expand the database of known HLA class I  
110 ligands by up to 35-40% for some major alleles such as HLA-A\*11:02 and HLA-A\*34:02  
111 (Figure 1c).

112

### 113 **Extent of tryptic peptide contaminations in HLA peptidomics data**

114 Past analyses of HLA peptidomics were careful not to report 9-mer tryptic peptides as  
115 antigens for HLA alleles whose binding motifs do not end with an arginine or a lysine<sup>10</sup>. Among  
116 88 HLA class I alleles investigated in this study, 12 have binding motifs ending with an arginine  
117 or a lysine (Figure 2a, HLA-A\*03:01, HLA-A\*11:01, HLA-A\*11:02, HLA-A\*30:01, HLA-  
118 A\*31:01, HLA-A\*33:01, HLA-A\*33:03, HLA-A\*34:01, HLA-A\*34:02, HLA-A\*66:01, HLA-  
119 A\*68:01, and HLA-A\*74:01). However, 2,838 tryptic peptides identified for the other 76 alleles  
120 are reported as positive antigens in the Immune Epitope Database (IEDB)<sup>15</sup>. Motif clustering  
121 with GibbsCluster<sup>23</sup> and binding affinity prediction with NetMHCpan<sup>24</sup> clearly illustrated that  
122 these tryptic peptides form a separate cluster with lower binding affinities than the known motifs  
123 (Figure 2b and Supplementary Figure 1). Clusters of tryptic peptides were observed for 11 HLA  
124 class I alleles where greater than 13% of identified peptides are tryptic. In extreme cases such as  
125 for HLA-B\*57:01 and HLA-B\*35:01, more than 42% of all identified peptides are tryptic, and  
126 more than half (365 out of 709) of these tryptic peptides are reported as legitimate ligands in  
127 IEDB. To test whether these tryptic peptides are specifically recognized by the corresponding  
128 HLA alleles, and thus may be true ligands, predicted binding affinities for observed tryptic  
129 peptide-HLA allele pairs were compared with the predicted binding affinities between random  
130 pairs. This finding revealed that almost every HLA allele does not exhibit a stronger affinity  
131 toward the observed tryptic peptides compared with random tryptic peptides (Supplementary  
132 Figure 2). Hence, these tryptic peptides are likely to be contaminants. Furthermore, the bimodal  
133 distribution of predicted binding affinities observed in HLA alleles whose motifs contain an  
134 arginine or a lysine at the last position, such as HLA-A\*11:01 (Figure 2a), strongly suggests that  
135 some of the identified tryptic peptides are not true ligands for these alleles as well.

136

### 137 **HLA alleles with multiple binding motifs**

138 In addition to revealing clusters of false-positive tryptic peptides, unsupervised motif  
139 clustering also showed that several HLA class I alleles possess multiple motif specificities that  
140 cannot be explained by length alone<sup>11</sup>. For example, antigens of HLA-B\*14:02 contain arginine  
141 exclusively at either the 2<sup>nd</sup> or the 5<sup>th</sup> position of the motif with only slight differences in  
142 predicted binding affinities (Figure 2c, average predicted affinities are 2,067 nM and 1,733 nM,  
143 respectively). The motif for this allele was previously reported as a combined pattern with  
144 arginine at both positions<sup>10,14</sup>. Other alleles with multiple, clearly distinct motifs include HLA-  
145 B\*15:01, HLA-B\*51:01, and HLA-B\*53:01 (Supplementary Figure 3). Additionally, several  
146 alleles also contain multiple related motifs that differ only by the shift of the anchor residue at  
147 the 2<sup>nd</sup> position to the 1<sup>st</sup> position (Supplementary Figure 4).

148

### 149 **False positives in HLA peptidomics data**

150 A by-product of unsupervised motif clustering is the designation of outlier peptides that  
151 do not fit into any motif. Here, a peptide is labeled as an outlier if the quality of the motif  
152 clustering, as measured by Kullback-Liebler distance in GibbsCluster, is improved by removing  
153 the peptide from the analysis. This result revealed that up to 5-6% of identified peptides were  
154 classified as outliers for some HLA alleles (e.g., HLA-B\*14:02 and HLA-A\*02:05,  
155 Supplementary Table 2). As expected, the predicted binding percentage ranks of these outliers  
156 were much higher than those of peptides belonging to motif clusters (Figure 2d, higher  
157 percentage rank indicates weaker binding affinity). More than 83.8% and 95.5% of outliers do  
158 not pass the 2% rank threshold for weak binder and the 0.5% rank threshold for strong binder<sup>24</sup>,  
159 respectively. In contrast, only 10.2% and 20.4% of peptides that belong to motif clusters failed  
160 the same thresholds. Among peptides with unknown origins, which were identified solely by *de*  
161 *novo* sequencing, more than 47% of them pass the 0.5% rank threshold for strong binder (Figure  
162 2e).

163 To test whether outlier peptides identified by unsupervised motif clustering are false  
164 positives or true ligands with very weak binding affinity, we performed an HLA binding assay  
165 on 59 newly identified antigens for HLA-B\*14:02 (Supplementary Table 3, 13 outliers and 46  
166 non-outlier peptides). This assay showed that all outlier peptides except LRNGGHFVI and  
167 LPFCRPGPEGQL exhibited almost no binding activity against the HLA molecules (Figure 3a,  
168 relative binding activity <1% of positive control). The high binding affinity of LRNGGHFVI  
169 and LPFCRPGPEGQL may be attributed to the arginine residues. LRNGGHFVI was likely  
170 called an outlier because its non-arginine residues did not fit the motif profile of HLA-B\*14:02  
171 (Figure 2c, top cluster). For LPFCRPGPEGQL, this peptide was likely called an outlier because  
172 the middle arginine residue was not predicted to take part in the 9-mer binding motif by  
173 NetMHCpan (the predicted core motif was LPFGPEGQL). Overall, the experimental binding  
174 result is in good agreement with computational affinity prediction (Figure 3b, Spearman's rank  
175 correlation = -0.62 with p-value = 1.6e-7). These pieces of evidence together strongly suggest  
176 that outlier peptides are false positives.

177

### 178 **Application of SMSNet on multi-allelic peptidomics data**

179 To showcase the capability of SMSNet in a multi-allelic setting, SMSNet and PEAKS<sup>25,26</sup>  
180 were used to analyze an HLA peptidomics experiment of a B-lymphoblastoid cell line expressing  
181 HLA-A\*01:01, HLA-B\*08:01, HLA-C\*07:01, HLA-DPA1\*01:03, HLA-DPB1\*04:01/02:01,  
182 HLADQA1\*05:01/05:01, HLA-DQB1\*02:01/02:01, and HLADRB1\*03:01/03:01. HLA class I  
183 and class II peptidomes were isolated and analyzed separately. NNAlign\_MA<sup>27</sup> was used to

184 predict the binding probabilities for each identified antigen simultaneously against all HLA class  
185 I or class II alleles present. The maximum predicted binding score was taken for each peptide.  
186 Peptide sequencing with PEAKS was performed in two modes: the *de novo*-assisted database  
187 search mode (PEAKS-DB) and the fully *de novo* mode (PEAKS-DeNovo). As each tool was  
188 optimized differently, the confidence thresholds for peptide identification were set separately  
189 (see Methods). For PEAKS-DeNovo, confidence score thresholds ranging from 0.7 to 0.9 were  
190 explored. The results for PEAKS-DeNovo at a score threshold of 0.7 were selected, but it should  
191 be noted that increasing this threshold did not alter the conclusion.

192 For HLA class I peptidome, SMSNet and PEAKS-DB had a 40% overlap at peptide level  
193 (Figure 4a and Supplementary Table 4) and agreed on the same peptides for 98% of the MS/MS  
194 spectra identified by both tools (2,170 of 2,215 spectra). In contrast, PEAKS-DeNovo produced  
195 quite a different set of peptides (Figure 4a). SMSNet and PEAKS-DeNovo agreed on the same  
196 peptide for only 27% of the MS/MS spectra identified by both tools (526 of 1,973 spectra). To  
197 assess the quality of peptides identified by each tool, predicted HLA binding scores and peptide  
198 identification confidence scores were visualized together. Tools that identified peptides with high  
199 HLA binding scores with high confidences should be preferable. This analysis revealed that both  
200 SMSNet and PEAKS-DB identified peptides with high predicted binding probabilities and high  
201 confidences (heatmaps in Figure 4b). On the other hand, peptides identified *de novo* by PEAKS-  
202 DeNovo exhibited a bimodal distribution of predicted binding probabilities, with two modes at  
203 0.5 and 1.0 (Figure 4c, the leftmost panels), which indicated that there is a substantial number of  
204 false positives.

205 To rule out the possibility that SMSNet produced peptides with high quality only because  
206 it relied on a follow-up database search after *de novo* sequencing to reduce errors, the set of  
207 peptides identified by both SMSNet and PEAKS-DeNovo and the set of peptides fully identified  
208 *de novo* by SMSNet before the database search step were analyzed separately. There were clear  
209 shifts in predicted binding scores toward 0.8-1.0 in both cases compared to PEAKS-DeNovo's  
210 predictions (Figure 4c, the middle and rightmost panels), suggesting that *de novo* sequencing by  
211 SMSNet identified highly probable peptides. It should be noted that all methods also identified  
212 other peptides whose lengths do not match the expected lengths of HLA class I ligands (8-15  
213 amino acids), and peptides with modifications were not considered here because their binding  
214 probabilities could not be predicted.

215 For the HLA class II peptidome, all tools made fewer identifications and had smaller  
216 overlap than HLA class I peptidome's results (Figure 5a). This finding is likely because HLA  
217 class II antigens are much longer<sup>28</sup> and consequently harder to confidently identify from MS/MS  
218 spectra. Only one peptide identified by PEAKS-DeNovo was also identified by others. In terms  
219 of the predicted binding scores, peptides identified by SMSNet exhibited slightly higher scores  
220 than PEAKS-DB's (Figure 5b, Mann-Whitney p-value = 0.0131) and PEAKS-DeNovo's (Mann-  
221 Whitney p-value = 4.34e-60). But as most of the predicted binding probabilities were below 0.5,  
222 it is inconclusive whether one tool is better than the others.

223

## 224 Discussion

225 Our work highlighted the need for a careful downstream analysis of peptides identified  
226 from the HLA peptidomics experiment to remove potential false positives. Although a prior  
227 work has provided detailed analyses to account for non-ligand contaminants<sup>20</sup>, there are still true  
228 peptide identifications that bind very weakly or non-specifically to the target HLA allele.  
229 Inclusion of these peptides as true HLA ligands in community database can potentially mislead

230 researchers as HLA peptidome-derived peptides are not accompanied with binding affinity  
231 values. Unsupervised clustering of identified putative HLA ligands not only elucidate allele-  
232 specific binding motif patterns<sup>11,12</sup> but also revealed clusters of tryptic peptides for HLA alleles  
233 that should not recognize an arginine or a lysine at the C-terminus of the binding motif  
234 (Supplementary Figure 1) as well as outlier peptides that do not fit into any cluster. A small-scale  
235 HLA binding experiment of putative ligands of HLA\*B14:02 confirmed that almost all outliers  
236 (11 of 13) exhibited no binding activity (Figure 3a, relative affinity < 1% of positive control)  
237 while 72% (33 of 46) of non-outliers exhibited some binding activities. Outlier peptides are also  
238 predicted to be weaker binders than *de novo*-identified peptides whose origins cannot be verified  
239 (Figure 2d and 2e, NetMHCpan % rank eluted ligand). Similarly, most tryptic peptides are likely  
240 false positives because their predicted binding affinities are not stronger than those between  
241 random tryptic peptides and HLA alleles (Supplementary Figure 2).

242 Overall, there are 3,846 potential false positives identified here that have been reported as  
243 positive antigens in the IEDB database. Although this number may seem small compared to the  
244 current size of the IEDB database (>300,000 allele-specific antigens), the presence of potential  
245 false positives is substantial for HLA alleles with fewer known ligands. For example, 23% (679  
246 of 2,957), 16% (342 of 2,165), and 11% (209 of 1,843) of IEDB reported ligands for HLA-  
247 C\*03:03, HLA-A\*36:01, and HLA-B\*57:01, respectively, are flagged as potential false positives  
248 here. Furthermore, the bimodal distribution of predicted affinities suggested that there are more  
249 false positives among peptides that belong to motif clusters (Figure 2a). Hence, careful analysis  
250 of both future HLA peptidomics data and the data already deposited into the IEDB database is  
251 needed in order to maintain the integrity of community antigen databases and prevent errors from  
252 propagating into HLA binding prediction and immunogenicity prediction models.

253 It is interesting to note that this work and prior unsupervised clustering analyses of the  
254 same HLA class I alleles<sup>11,12</sup> do not always identify the same multiple motif specificities. For  
255 example, three motifs were identified for HLA-B\*15:01 here (Supplementary Figure 3) but not  
256 in prior analysis<sup>11</sup>. On the other hand, three motifs for HLA-B\*07:02 were previously reported<sup>12</sup>,  
257 but only a single motif was identified here. This latter case is especially unexpected because the  
258 motif identified here was not the one with the highest number of associated peptides among the  
259 three reported motifs. As a quality control, both motifs of HLA-B\*51:01 (Supplementary Figure  
260 3) were consistently identified<sup>11</sup>. In addition to multiple specificities, related motifs that differ by  
261 a shift of the 2<sup>nd</sup> residue position to the 1<sup>st</sup> residue position, with only minor changes in predicted  
262 binding affinities, were observed in several alleles (Supplementary Figure 4). These likely  
263 indicate the presence of 10-mer or longer motif patterns that were truncated to 9-mer during the  
264 core binding motif prediction by NetMHCpan. Lastly, unsupervised clustering was also able to  
265 capture minor inter-residue cooperation between non-anchor positions and represent them in  
266 separate motif clusters (HLA-B\*53:01 in Supplementary Figure 3, HLA-B\*15:03 and HLA-  
267 B\*40:01 in Supplementary Figure 4).

268 Our work also illustrated the capability of hybrid *de novo* sequencing with SMSNet for  
269 uncovering new HLA antigens in both mono-allelic and multi-allelic peptidomics samples. More  
270 than 36,000 new peptide-HLA pairs were identified from public mono-allelic HLA class I  
271 peptidomics datasets<sup>8,17</sup> that have already been extensively analyzed. The new putative antigens  
272 could potentially expand the antigen pools for some HLA alleles by up to 40% (Figure 1a and  
273 1c). SMSNet exhibited good agreement with the *de novo*-assisted database search mode of  
274 PEAKS (PEAKS-DB), both producing peptide identifications with high predicted binding  
275 affinities to HLA class I alleles (Figure 4b). Furthermore, in the absence of a reference proteome

276 database, SMSNet was able to produce peptides with higher predicted binding affinities than the  
277 *de novo* mode of PEAKS (PEAKS-DeNovo, Figure 4c). Putative HLA class II antigens  
278 identified by SMSNet also have slightly higher predicted binding affinities than both modes of  
279 PEAKS (Figure 5b), while PEAKS-DB produced many more identifications. The drop in the  
280 number of peptides identified from HLA class I to HLA class II peptidomics data is likely  
281 because HLA class II antigens consist of longer peptides which are more difficult to identify,  
282 especially for SMSNet and PEAKS-DeNovo which rely primarily on *de novo* sequencing.  
283 Overall, *de novo* analysis of HLA peptidomics would benefit from combining results from  
284 SMSNet and PEAKS-DB together to increase antigen detection sensitivity. It should be noted  
285 that combining results from multiple software tools is a well-established approach that has been  
286 shown to improve the quality of proteomics analyses<sup>29,30</sup>.

287

## 288 **Methods**

### 289 **Cell line and antibody preparation**

290 B-lymphoblastoid cell line (BLCL1408-1038) expressing HLA-A\*01:01, HLA-B\*08:01,  
291 HLA-C\*07:01, HLA-DPA1\*01:03, HLA-DPB1\*04:01/02:01, HLADQA1\*05:01/05:01, HLA-  
292 DQB1\*02:01/02:01, and HLADRB1\*03:01/03:01 was purchased from Fred Hutchinson Cancer  
293 Research Center, Washington, USA. Cells were cultured in RPMI 1640 media supplemented  
294 with 10% fetal bovine serum, 50 U/ml penicillin in a humidified incubator at 37C with 5% CO<sub>2</sub>.  
295 Purified pan HLA-A, -B, -C and pan HLA-DR, -DP, -DQ antibodies were generated from W6/32  
296 (ATCC, USA) and IVA12 (provided by the lab of Professor Anthony Purcell, Monash  
297 University, Australia) hybridoma cells cultured in RPMI 1640 media supplemented with 10%  
298 fetal bovine serum, 50 U/ml penicillin and expanded in roller bottles at 37C with 5% CO<sub>2</sub>.  
299 Secreted monoclonal antibodies were harvested from spent media and purified using Protein A  
300 resin with ÄKTA purification system (Cytiva, USA).

301

### 302 **Immunoprecipitation of HLA class I and class II complexes**

303 BLCL1408-1038 cell pellets ( $1 \times 10^8$ ) were pulverised using an MM400 Retsch Mixer  
304 Mill (Retsch, Germany) and lysed with 0.1% IGEPAL CA-630, 100 mM Tris, 300 mM NaCl,  
305 pH 8.0 Complete Protease Inhibitor Cocktail (Roche, Switzerland). The supernatant was passed  
306 through a Protein G resin pre-column (500  $\mu$ L) to remove non-specific binding materials. HLA  
307 class I and II immunoaffinity purification was performed as previously described<sup>31</sup>. Briefly, the  
308 pre-cleared supernatant was incubated with 10 mg of pan HLA-A, -B, and -C antibodies or 10  
309 mg of pan HLA-DR, -DP, and -DQ antibodies coupled to Protein G resin with rotation overnight  
310 at 4C. After conjugation, the resins were washed with 10 ml of ice-cold wash buffer 1 (0.005%  
311 IGEPAL, 50 mM Tris, pH 8.0, 150 mM NaCl, 5 mM EDTA), 10 ml of ice-cold wash buffer 2  
312 (50 mM Tris, pH 8.0, 150 mM NaCl), and 10 ml of ice-cold wash buffer 3 (50 mM Tris, pH 8.0,  
313 450 mM NaCl). Bound complexes were eluted from the column using 5 column volumes of 10%  
314 acetic acid. Eluted peptides were fractionated by reverse-phase high-performance liquid  
315 chromatography (Shimadzu, Japan) on a 4.6 mm diameter Chromolith SpeedROD RP-18 (Merck,  
316 USA). The optimized conditions were as follows: mobile phase A (0.05% v/v TFA, 2.5% v/v  
317 ACN in water), mobile phase B (0.045% v/v TFA, 90% v/v ACN in water), flow rate of 1  
318 mL/minute, temperature of 30C, and injection volume of 200  $\mu$ L. The elution program was set as  
319 follows: 0-5% of mobile phase B over 1 minute, 5-15% of mobile phase B over 4 minutes, 15-  
320 45% of mobile phase B over 30 minutes, 45-100% of mobile phase B over 15 minutes, and  
321 100% of mobile phase B over 4 minutes. Fractions were collected in 1 mL each. Consecutive

322 fractions were pooled into 11 fractions. Pooled fractions were concentrated by vacuum  
323 centrifugation and reconstituted in 0.1% FA.

324

### 325 **LC-MS/MS analysis of HLA peptidome**

326 Pooled peptide fractions eluted from an HLA class I sample and an HLA class II sample  
327 were analyzed on a Q Exactive mass spectrometer (Thermo Fisher Scientific, USA) coupled to  
328 an EASY-nLC 1000 (Thermo Fisher Scientific, USA). Peptide samples were separated at a flow  
329 rate of 300  $\mu$ L/minute of buffer B (80% ACN, 0.1% FA). The gradient was set at 4-20% of  
330 buffer B over 30 minutes, 20-28% of buffer B over 40 minutes, 28-40% of buffer B over 5  
331 minutes, 40-95% of buffer B over 3 minutes, washing with 95% of buffer B over 8 minutes, re-  
332 equilibration with buffer A (2% ACN/0.1% FA) over 5 minutes. Mass spectra resolutions were  
333 set at 70,000 for full MS scans and 17,500 for MS/MS scans. The normalized collision energy  
334 for HCD fragmentation was set at 30%. The m/z scan range was set at 350-1,400. Dynamic  
335 exclusion was set at 15 seconds. For HLA class I samples, the maximum injection times were set  
336 at 120 ms for full MS scan and 120 ms for MS/MS scans. Precursor ions with charge states +2,  
337 +3, +4, and +5 were accepted. For HLA class II samples,  
338 the maximum injection times were set at 200 ms for full MS scan and 120 ms for MS/MS scans.  
339 Precursor ions with charge states +2, +3, +4, +5, and +6 were accepted.

340

### 341 **Collection of published HLA class I peptidomics and antigen data**

342 A combined dataset of mass spectrometry raw data of mono-allelic HLA class I  
343 peptidomes (399 raw files, 88 HLA alleles) were obtained from two prior studies<sup>8,17</sup>  
344 (MSV000080527 and MSV000084172). List of reported antigen-HLA pairs were obtained from  
345 the Immune Epitope Database<sup>15</sup> (IEDB, downloaded December 2020), the HLA Ligand Atlas<sup>32</sup>  
346 (downloaded June 2020), and from peptidomics analyses of multi-allelic patient samples<sup>8,33</sup>. It  
347 should be noted that these recent studies of patient samples not only reported new data but also  
348 provided compilations of multi-allelic peptidomics data from earlier studies.

349

### 350 **Peptide sequencing of MS/MS data**

351 For *de novo* peptide sequencing with SMSNet<sup>21</sup>, MS/MS spectra and precursor masses  
352 were extracted from raw MS files using ProteoWizard<sup>34</sup> with the following parameters: Peak  
353 Picking = Vendor for MS1 and MS2, Zero Samples = Remove for MS2, MS Level = 2-2, and the  
354 default Title Maker. Charge state deconvolution was not performed. The SMSNet-M model  
355 which treats carbamidomethylation of cysteine as fixed modification and oxidation of  
356 methionine as variable modification was used. Target amino acid-level false discovery rate was  
357 set at 5%. Precursor mass tolerance of 30 ppm was applied to discard identified peptides with  
358 high mass deviations. Partially identified peptides were searched against a UniProt<sup>35</sup> reference  
359 human proteome (downloaded August 2020) and a GRCh38 RefSeq<sup>36</sup> non-coding transcriptome  
360 (downloaded August 2020) to fill in the missing amino acids. From the transcriptome data,  
361 possible open reading frames that translate to at least 5 amino acids in length were considered.

362 For database search and *de novo* peptide sequencing with PEAKS version 8.5<sup>25</sup>, raw MS  
363 files were searched against a UniProt reference human proteome and reversed decoys. Cleavage  
364 enzyme specificity was set to none. Carbamidomethylation of cysteine, oxidation of methionine,  
365 and phosphorylation of serine, threonine, and tyrosine were set as variable modifications. A  
366 maximum of three modifications per peptide were allowed. Mass tolerances were set at 10 ppm



367 for precursor mass and at 0.02 Da for fragment mass. Target peptide-level false discovery rate  
368 was set at 1%.

369

### 370 **Explaining peptides with unknown origins**

371 Peptides that do not match to either reference human proteome or non-coding  
372 transcriptome were further analyzed to explain their origins. The proteasome-mediated splicing  
373 mechanism, which causes the joining of two distal peptide fragments from the same protein into  
374 a new contiguous peptide, was explored by considering all possible combinations of 3-12 amino  
375 acid peptides originating from non-overlapping regions of each protein. Only proteins that were  
376 already identified with some peptides in the same dataset were considered as sources of spliced  
377 peptides. If multiple possible splicing events could explain an observed peptide, the one  
378 involving peptides that are nearest to each other on a protein was selected as the most likely  
379 explanation. To check whether some peptides could be explained by splicing events by chance  
380 alone, the amino acid sequences of these peptides were randomly shuffled and reanalyzed. This  
381 revealed that using proteasome-mediated splicing as explanation may not be reliable because as  
382 many as 45% (99 out of 222) of randomized sequences could still be matched to some  
383 hypothetical spliced peptides. Furthermore, missense mutations could serve as an alternative  
384 explanation for 30% (66 out of 222) of peptides that could be explained by proteasome-mediated  
385 splicing.

386

### 387 **HLA binding affinity and binding motif analyses**

388 For peptides identified from mono-allelic HLA peptidome experiments<sup>8,17</sup>, the binding  
389 affinities and the 9-mer binding motifs for the corresponding HLA alleles were predicted using  
390 NetMHCpan-4.1<sup>24</sup> with default setting. For peptides identified from multi-allelic B-  
391 lymphoblastoid cell line, the binding affinities were predicted against all HLA class I or class II  
392 alleles present using NNAlign\_MA<sup>27</sup>. Predicted 9-mer binding motifs for each HLA class I allele  
393 were then clustered using GibbClusters<sup>23</sup>. For each allele, the clustering was performed with  
394 number of clusters ranging from 1 to 5, with or without outlier detection, and with inter-cluster  
395 penalty parameter  $\lambda$  ranging from 0.1 to 0.8. The optimal number of clusters was determined  
396 from the parameter setting with the highest Kullback-Liebler distance (KLD) as recommended  
397 by the authors<sup>23</sup>. Information contents and the amino acid profiles of 9-mer binding motif  
398 clusters were visualized using Logomaker<sup>37</sup>.

399

### 400 **HLA binding assay**

401 The binding activities of selected 59 newly identified candidate antigens for HLA-  
402 B\*14:02 (Supplementary Table 3) were assessed using the REVEAL MHC-peptide binding  
403 assay provided by ProImmune, Ltd. (Oxford, UK). Peptides were synthesized and quality  
404 checked using MALDI-TOF mass spectrometry by ProImmune, Ltd. (Oxford, UK). Binding  
405 activities were reported as percentage relative to the affinity of a positive control (a known high-  
406 affinity T cell epitope for HLA-B\*14:02). According to the experiment report provided by the  
407 company, the standard error of the reported affinities is 3 percentage points.

408

### 409 **Data availability**

410 Identified peptides from public mono-allelic HLA peptidomes are provided in  
411 Supplementary Table 1 along with binding affinity prediction and outlier detection result. HLA  
412 binding assay results are provided in Supplementary Table 3. Identified peptides from the multi-

413 allelic B cell peptidome are provided in Supplementary Table 4. Raw mass spectrometry data for  
414 the multi-allelic B cell peptidome are available at PXD028088. Visualizations of all identified  
415 motifs are available on FigShare at 10.6084/m9.figshare.16025226.

416

## 417 Reference

- 418 1. Purcell AW, McCluskey J, Rossjohn J. More than one reason to rethink the use of  
419 peptides in vaccine design. *Nat Rev Drug Discov*. May 2007;6(5):404-14. doi:10.1038/nrd2224
- 420 2. Mellman I, Coukos G, Dranoff G. Cancer immunotherapy comes of age. *Nature*. Dec 21  
421 2011;480(7378):480-9. doi:10.1038/nature10673
- 422 3. Fleri W, Paul S, Dhanda SK, et al. The Immune Epitope Database and Analysis Resource  
423 in Epitope Discovery and Synthetic Vaccine Design. *Front Immunol*. 2017;8:278.  
424 doi:10.3389/fimmu.2017.00278
- 425 4. Gloger A, Ritz D, Fugmann T, Neri D. Mass spectrometric analysis of the HLA class I  
426 peptidome of melanoma cell lines as a promising tool for the identification of putative tumor-  
427 associated HLA epitopes. *Cancer Immunol Immunother*. 11 2016;65(11):1377-1393.  
428 doi:10.1007/s00262-016-1897-3
- 429 5. Banchereau J, Palucka K. Immunotherapy: Cancer vaccines on the move. *Nature Reviews*  
430 *Clinical Oncology*. 2017;15(1):9-10.
- 431 6. Sahin U, Tureci O. Personalized vaccines for cancer immunotherapy. *Science*.  
432 2018;359(6382):1355-1360.
- 433 7. Rötzschke O, Falk K. Naturally-occurring peptide antigens derived from the MHC class-I-  
434 restricted processing pathway. *Immunol Today*. Dec 1991;12(12):447-55. doi:10.1016/0167-  
435 5699(91)90018-O
- 436 8. Sarkizova S, Klaeger S, Le PM, et al. A large peptidome dataset improves HLA class I  
437 epitope prediction across most of the human population. *Nat Biotechnol*. 02 2020;38(2):199-  
438 209. doi:10.1038/s41587-019-0322-9
- 439 9. Ruppert J, Sidney J, Celis E, Kubo RT, Grey HM, Sette A. Prominent role of secondary  
440 anchor residues in peptide binding to HLA-A2.1 molecules. *Cell*. Sep 10 1993;74(5):929-37.  
441 doi:10.1016/0092-8674(93)90472-3
- 442 10. Bassani-Sternberg M, Chong C, Guillaume P, et al. Deciphering HLA-I motifs across HLA  
443 peptidomes improves neo-antigen predictions and identifies allosteric regulating HLA specificity.  
444 *PLoS Comput Biol*. Aug 2017;13(8):e1005725. doi:10.1371/journal.pcbi.1005725
- 445 11. Gfeller D, Guillaume P, Michaux J, et al. The Length Distribution and Multiple Specificity  
446 of Naturally Presented HLA-I Ligands. *J Immunol*. 12 15 2018;201(12):3705-3716.  
447 doi:10.4049/jimmunol.1800914
- 448 12. Bassani-Sternberg M, Gfeller D. Unsupervised HLA Peptidome Deconvolution Improves  
449 Ligand Prediction Accuracy and Predicts Cooperative Effects in Peptide-HLA Interactions. *J*  
450 *Immunol*. 09 15 2016;197(6):2492-9. doi:10.4049/jimmunol.1600808
- 451 13. Geluk A, van Meijgaarden KE, Southwood S, et al. HLA-DR3 molecules can bind peptides  
452 carrying two alternative specific submotifs. *J Immunol*. Jun 15 1994;152(12):5742-8.
- 453 14. Rapin N, Hoof I, Lund O, Nielsen M. MHC motif viewer. *Immunogenetics*. Dec  
454 2008;60(12):759-65. doi:10.1007/s00251-008-0330-2
- 455 15. Vita R, Overton JA, Greenbaum JA, et al. The immune epitope database (IEDB) 3.0.  
456 *Nucleic Acids Research*. 2015;43(D1):D405-D412.

- 457 16. Peters B, Tong W, Sidney J, Sette A, Weng Z. Examining the independent binding  
458 assumption for binding of peptide epitopes to MHC-I molecules. *Bioinformatics*. Sep 22  
459 2003;19(14):1765-72. doi:10.1093/bioinformatics/btg247
- 460 17. Abelin JG, Keskin DB, Sarkizova S, et al. Mass Spectrometry Profiling of HLA-Associated  
461 Peptidomes in Mono-allelic Cells Enables More Accurate Epitope Prediction. *Immunity*.  
462 2017;46(2):315-326.
- 463 18. Racle J, Michaux J, Rockinger GA, et al. Robust prediction of HLA class II epitopes by  
464 deep motif deconvolution of immunopeptidomes. *Nat Biotechnol*. 11 2019;37(11):1283-1286.  
465 doi:10.1038/s41587-019-0289-6
- 466 19. Keller BO, Sui J, Young AB, Whittal RM. Interferences and contaminants encountered in  
467 modern mass spectrometry. *Anal Chim Acta*. Oct 03 2008;627(1):71-81.  
468 doi:10.1016/j.aca.2008.04.043
- 469 20. Fritsche J, Kowalewski DJ, Backert L, et al. Pitfalls in HLA Ligandomics-How to Catch a  
470 Li(e)gand. *Mol Cell Proteomics*. Jun 12 2021;20:100110. doi:10.1016/j.mcpro.2021.100110
- 471 21. Karunratanakul K, Tang HY, Speicher DW, Chuangsuwanich E, Sriswasdi S. Uncovering  
472 Thousands of New Peptides with Sequence-Mask-Search Hybrid. *Mol Cell Proteomics*. 12  
473 2019;18(12):2478-2491. doi:10.1074/mcp.TIR119.001656
- 474 22. Trolle T, McMurtrey CP, Sidney J, et al. The Length Distribution of Class I-Restricted T  
475 Cell Epitopes Is Determined by Both Peptide Supply and MHC Allele-Specific Binding Preference.  
476 *J Immunol*. Feb 15 2016;196(4):1480-7. doi:10.4049/jimmunol.1501721
- 477 23. Andreatta M, Alvarez B, Nielsen M. GibbsCluster: unsupervised clustering and alignment  
478 of peptide sequences. *Nucleic Acids Res*. 07 03 2017;45(W1):W458-W463.  
479 doi:10.1093/nar/gkx248
- 480 24. Reynisson B, Alvarez B, Paul S, Peters B, Nielsen M. NetMHCpan-4.1 and NetMHCIIpan-  
481 4.0: improved predictions of MHC antigen presentation by concurrent motif deconvolution and  
482 integration of MS MHC eluted ligand data. *Nucleic Acids Res*. 07 02 2020;48(W1):W449-W454.  
483 doi:10.1093/nar/gkaa379
- 484 25. Zhang J, Xin L, Shan B, et al. PEAKS DB: de novo sequencing assisted database search for  
485 sensitive and accurate peptide identification. *Mol Cell Proteomics*. Apr  
486 2012;11(4):M111.010587. doi:10.1074/mcp.M111.010587
- 487 26. Ma B, Zhang K, Hendrie C, et al. PEAKS: powerful software for peptide de novo  
488 sequencing by tandem mass spectrometry. *Rapid communications in mass spectrometry*.  
489 2003;17(20):2337-2342.
- 490 27. Alvarez B, Reynisson B, Barra C, et al. NNAlign\_MA; MHC Peptidome Deconvolution for  
491 Accurate MHC Binding Motif Characterization and Improved T-cell Epitope Predictions. *Mol Cell*  
492 *Proteomics*. 12 2019;18(12):2459-2477. doi:10.1074/mcp.TIR119.001658
- 493 28. Rammensee HG. Chemistry of peptides associated with MHC class I and class II  
494 molecules. *Curr Opin Immunol*. Feb 1995;7(1):85-96. doi:10.1016/0952-7915(95)80033-6
- 495 29. Shteynberg D, Nesvizhskii AI, Moritz RL, Deutsch EW. Combining results of multiple  
496 search engines in proteomics. *Mol Cell Proteomics*. Sep 2013;12(9):2383-93.  
497 doi:10.1074/mcp.R113.027797
- 498 30. Park GW, Hwang H, Kim KH, et al. Integrated Proteomic Pipeline Using Multiple Search  
499 Engines for a Proteogenomic Study with a Controlled Protein False Discovery Rate. *J Proteome*  
500 *Res*. 11 04 2016;15(11):4082-4090. doi:10.1021/acs.jproteome.6b00376

- 501 31. Purcell AW, Ramarathinam SH, Ternette N. Mass spectrometry-based identification of  
502 MHC-bound peptides for immunopeptidomics. *Nat Protoc.* 06 2019;14(6):1687-1707.  
503 doi:10.1038/s41596-019-0133-y
- 504 32. Marcu A, Bichmann L, Kuchenbecker L, et al. HLA Ligand Atlas: a benign reference of  
505 HLA-presented peptides to improve T-cell-based cancer immunotherapy. *J Immunother Cancer.*  
506 Apr 2021;9(4)doi:10.1136/jitc-2020-002071
- 507 33. Solleder M, Guillaume P, Racle J, et al. Mass Spectrometry Based Immunopeptidomics  
508 Leads to Robust Predictions of Phosphorylated HLA Class I Ligands. *Mol Cell Proteomics.* 02  
509 2020;19(2):390-404. doi:10.1074/mcp.TIR119.001641
- 510 34. Chambers MC, MacLean B, Burke RaA, D. and Ruderman D. L. and Neumann S. and Gatto  
511 L. and Fischer B., et al. A cross-platform toolkit for mass spectrometry and proteomics. *Nature*  
512 *Biotechnology.* 2012;30:918-920.
- 513 35. Consortium U. UniProt: a worldwide hub of protein knowledge. *Nucleic acids research.*  
514 2018;47(D1):D506-D515.
- 515 36. O'Leary NA, Wright MW, Brister JR, et al. Reference sequence (RefSeq) database at  
516 NCBI: current status, taxonomic expansion, and functional annotation. *Nucleic Acids Research.*  
517 11 2015;44(D1):D733-D745.
- 518 37. Tareen A, Kinney JB. Logomaker: beautiful sequence logos in Python. *Bioinformatics.* 04  
519 01 2020;36(7):2272-2274. doi:10.1093/bioinformatics/btz921

520

## 521 **Acknowledgements**

522 This work was supported by the Thailand Research Fund MRG6280189 (S.S.), the Grant  
523 for Special Task Force for Activating Research, Ratchadapisek Sompoch Endowment Fund,  
524 Chulalongkorn University (S.S.), the Grant for the Development of New Faculty Staff,  
525 Ratchadapisek Sompoch Endowment Fund, Chulalongkorn University (S.S.), the Thailand  
526 Research Fund for Career Development Grant RSA6280026 (T.P.), and Program Management  
527 Unit for Competitiveness Grant C10F630106 (T.P.). We would like to thank Prof. Vorasuk  
528 Shotelersuk, Department of Pediatrics, Faculty of Medicine, Chulalongkorn University, for  
529 mentorship under the Thailand Research Fund program and Dr. Pokrath Hansasuta, Department  
530 of Microbiology, Faculty of Medicine, Chulalongkorn University for insightful advices on HLA  
531 research.

532

## 533 **Contributions**

534 C.S., T.B., and P.S. analyzed HLA peptidomics data. P.M. performed experiments. S.S.,  
535 P.S., and C.S. wrote the manuscript draft. S.S. and T.P. conceived and supervised the research.  
536 All authors contributed to and approved of the final manuscript.

537

## 538 **Competing interests**

539 The authors declare no competing interest.

540

## 541 **Tables**

542 None

543

544

545 **Figures**  
546

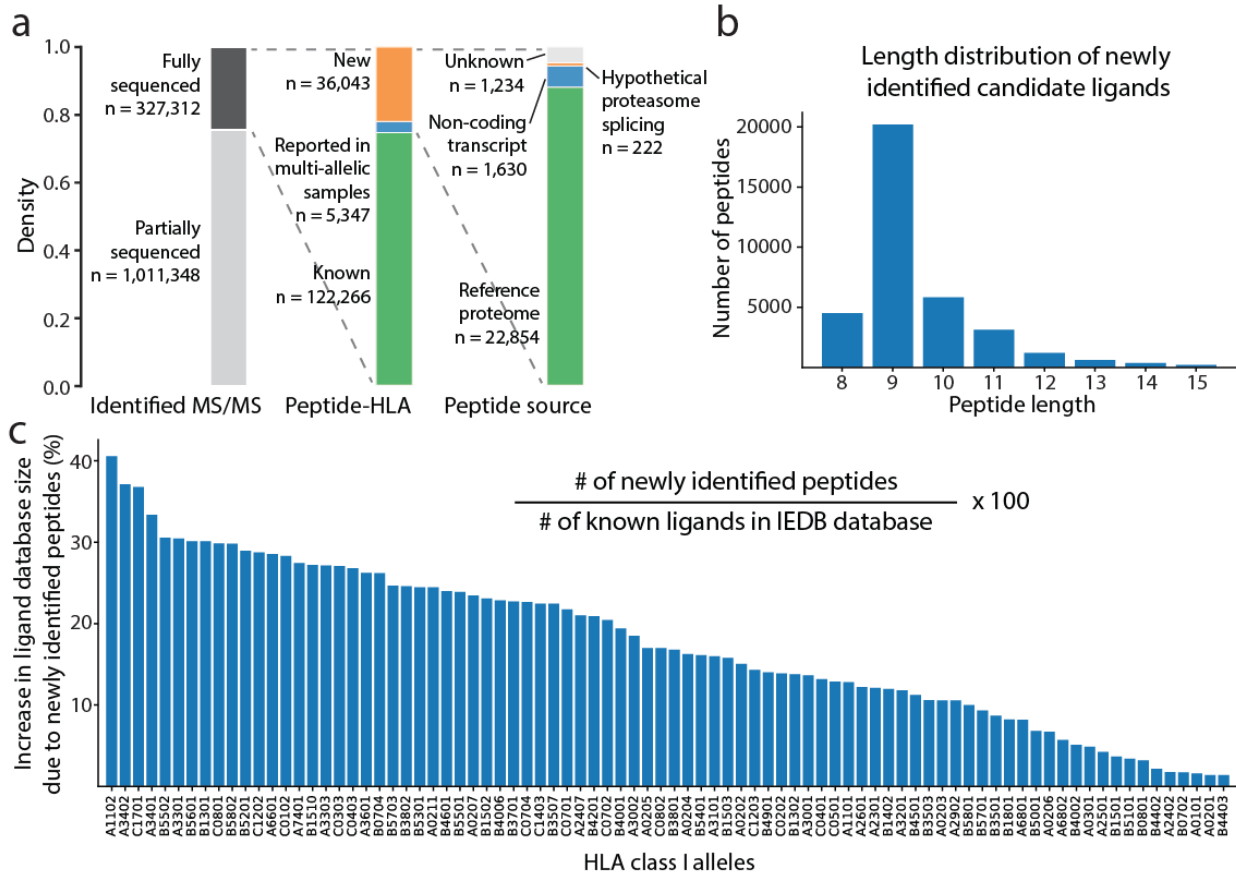

547 **Figure 1 – SMSNet identified a large number of new ligands from public HLA peptidomics**  
548 **datasets.** a) Statistics of MS/MS spectra, peptide-HLA pairs, and the sources of peptides  
549 identified by SMSNet on mono-allelic HLA peptidomics datasets of 88 HLA class I alleles (see  
550 Methods). b) Length distribution of all identified peptides. c) Potential increase in the size of the  
551 database of known ligands from this study, assuming that all newly identified sequences are true  
552 ligands. The number of known ligands for each allele was extracted from the IEDB database by  
553 counting unmodified antigens and antigens with major modifications, namely oxidized  
554 methionine and phosphorylated serine, threonine, and tyrosine.  
555  
556

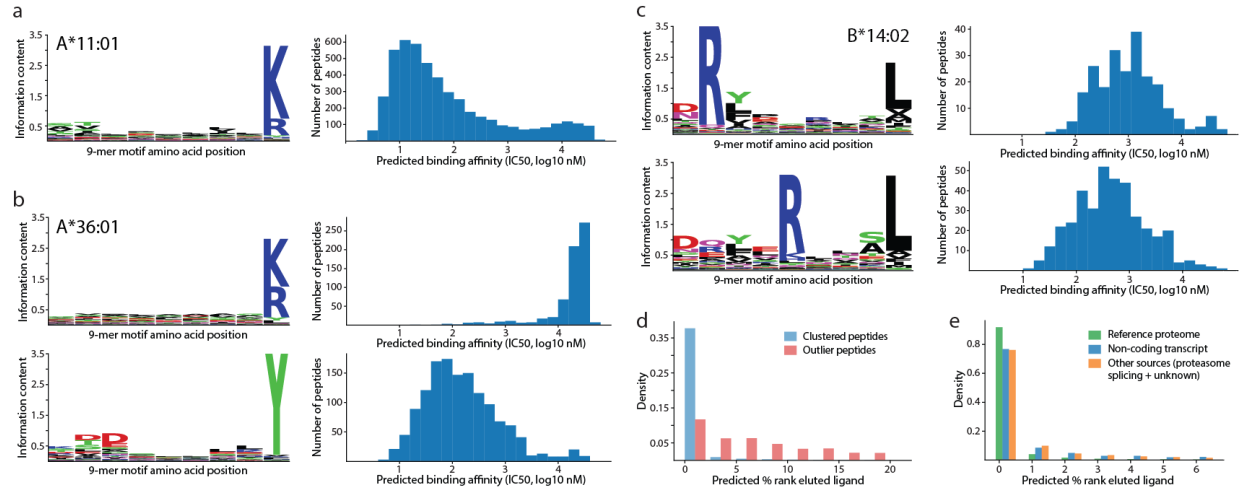

557  
558  
559  
560  
561  
562  
563  
564  
565  
566  
567  
568

**Figure 2 – Unsupervised clustering revealed potential false positives and multiple motif specificities.** a) Single 9-mer motif identified for HLA-A\*11:01 together with predicted binding affinities (IC50, nM unit). b) Two motifs identified for HLA-A\*36:01, one of which consists mainly of tryptic peptides and exhibits lower affinities (higher IC50 value indicates lower affinity). The top motif is expected to be a false positive. c) Two distinct motifs identified for HLA-B\*14:02 with arginine at different residue positions but similar predicted affinities. d) Distributions of predicted percentage rank (% rank) of eluted ligand for clustered peptides and outlier peptides. A higher % rank indicates lower binding affinity. Bin size is 2%. e) Distributions of predicted percentage rank of eluted ligand for peptides from various sources. Bin size is 1%.

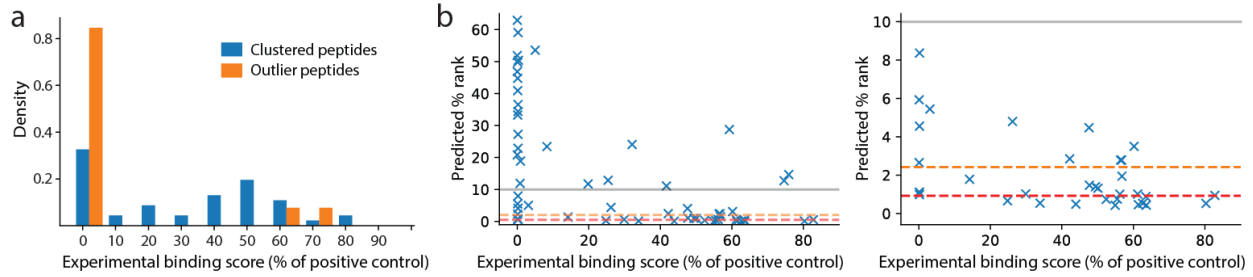

569  
570 **Figure 3 – HLA binding assay for HLA-B\*14:02.** Peptide synthesis and binding assay were  
571 performed by ProImmune, Ltd. (see Methods). a) Distributions of binding scores, measured as  
572 the percentages of the binding activity compared to a positive control, for clustered peptides (n =  
573 46) and outlier peptides (n = 13). b) Comparison of predicted percentage ranks of eluted ligand  
574 (% rank) and binding scores. The orange and red dashed lines indicate the 2% rank and 0.5%  
575 rank thresholds for weak and strong binders, respectively. The left panel shows the full range  
576 of % rank while the right panel shows the zoomed-in at % rank below 10%.  
577

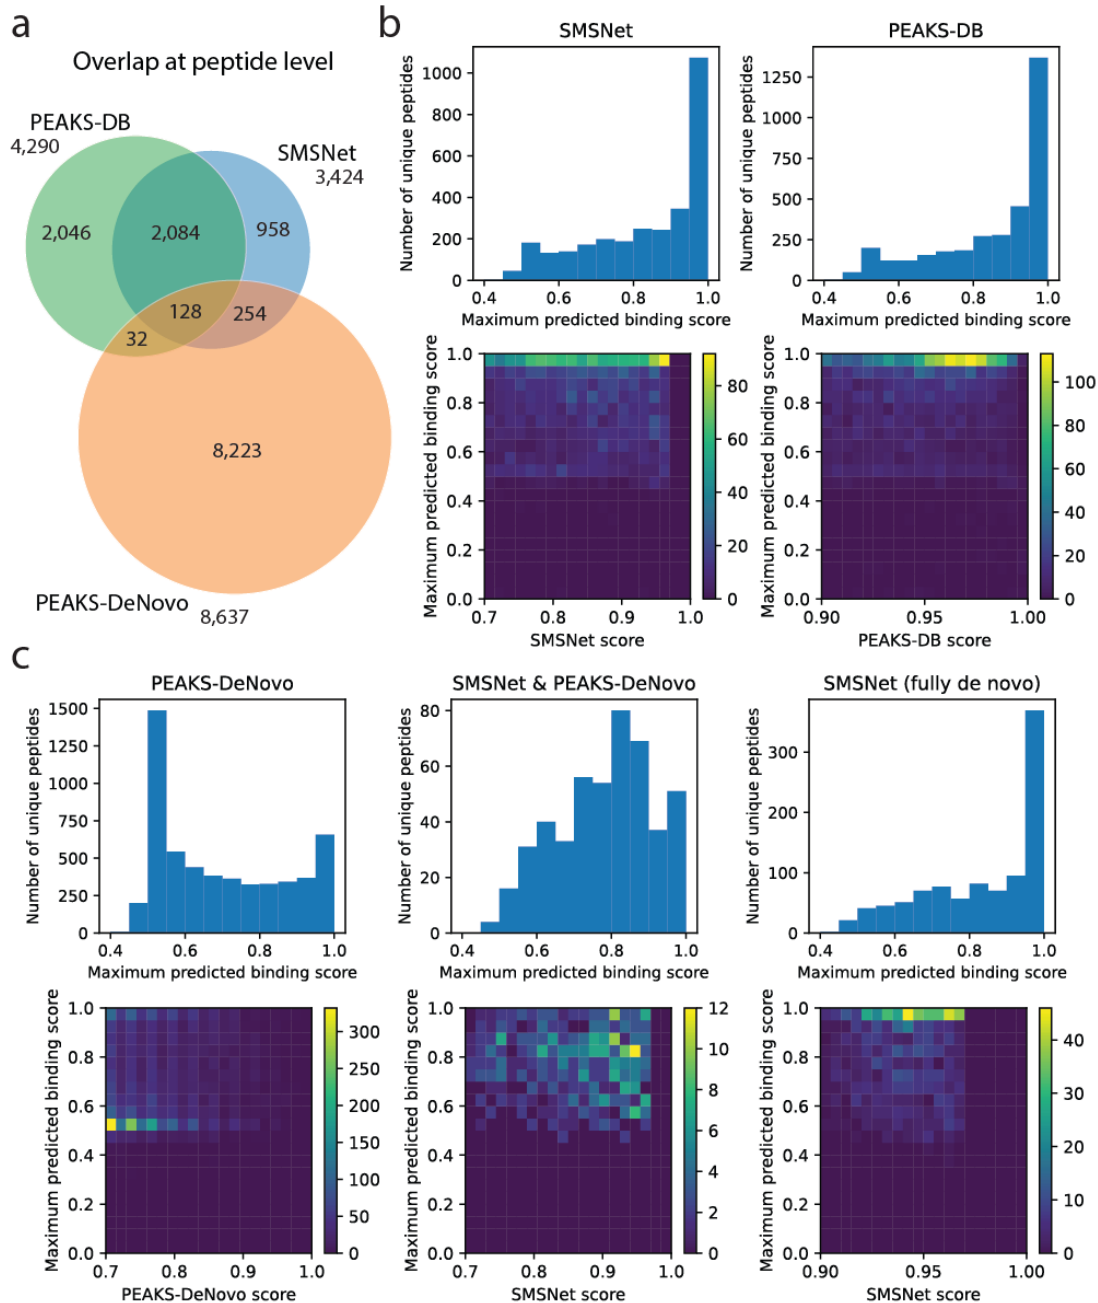

578  
 579 **Figure 4 – Comparison of SMSNet and PEAKS on multi-allelic HLA class I peptidomics**  
 580 **sample.** a) Overlap of identified peptides between SMSNet, the *de novo*-assisted database search  
 581 mode of PEAKS (PEAKS-DB), and the fully *de novo* mode of PEAKS (PEAKS-DeNovo). b)  
 582 Histograms show the distributions of predicted binding scores, calculated as the maximum score  
 583 over HLA-A\*01:01, HLA-B\*08:01, and HLA-C\*07:01 which are expressed in the cells, for  
 584 peptides identified by SMSNet and PEAKS-DB. Heatmaps show the association between  
 585 predicted binding scores and peptide identification confidence scores reported by each software.  
 586 c) Similar visualizations for peptides identified by PEAKS-DeNovo, peptides identified in  
 587 common by PEAKS-DeNovo and SMSNet, and peptides fully identified by the *de novo*  
 588 sequencing step of SMSNet (SMSNet can identify the full sequences of some peptides without  
 589 relying on reference database).



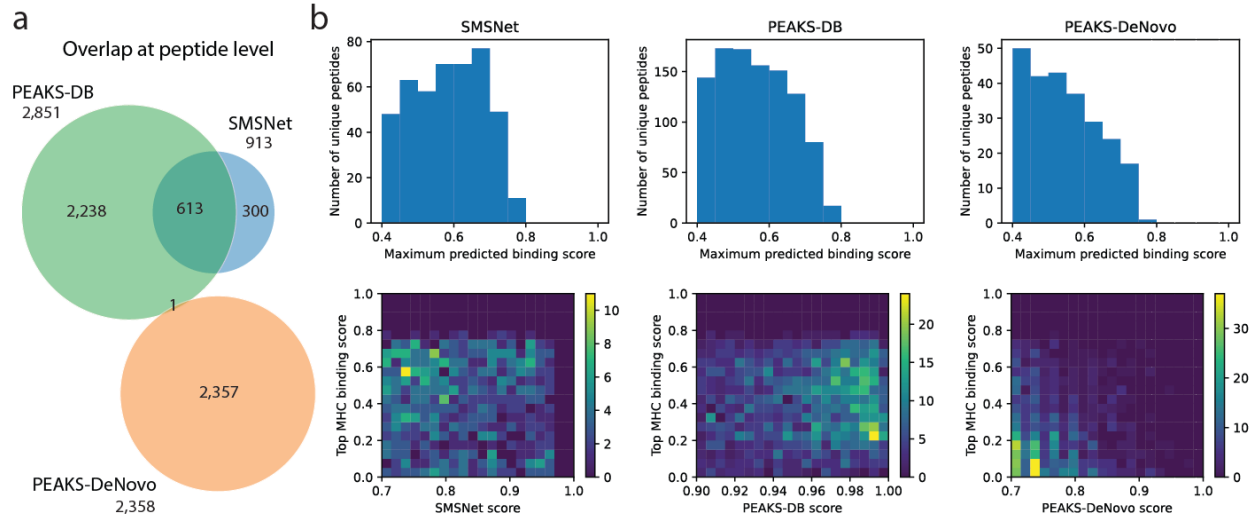

590  
591  
592  
593  
594  
595  
596  
597  
598  
599

**Figure 4 – Comparison of SMSNet and PEAKS on multi-allelic HLA class II peptidomics sample.** a) Overlap of identified peptides between SMSNet, the *de novo*-assisted database search mode of PEAKS (PEAKS-DB), and the fully *de novo* mode of PEAKS (PEAKS-DeNovo). b) Histograms show the distributions of predicted binding scores, calculated as the maximum score over HLA-DPA1\*01:03, HLA-DPB1\*04:01/02:01, HLADQA1\*05:01/05:01, HLA-DQB1\*02:01/02:01, and HLADRB1\*03:01/03:01 which are expressed in the cells, for peptides identified by SMSNet, PEAKS-DB, and PEAKS-DeNovo. Heatmaps show the association between predicted binding scores and peptide identification confidence scores reported by each software.

## Supplementary Tables

Supplementary Table 1 – List of all identified peptides together with predicted binding affinities and outlier detection results from mono-allelic peptidomics data of 88 HLA class I alleles

Supplementary Table 2 – Percentages of outlier peptides for HLA class I alleles with low percentage of tryptic peptides

Supplementary Table 3 – HLA-B\*14:02 binding assay results for selected 59 peptides

Supplementary Table 4 – SMSNet and PEAKS identification results for multi-allelic B-lymphoblastoid cell line

## Supplementary Figures

| HLA Allele | Total Identified Peptides | Tryptic Peptides |
|------------|---------------------------|------------------|
| B*35:01    | 862                       | 354 (41%)        |
| B*57:01    | 766                       | 302 (39%)        |
| C*03:03    | 3,071                     | 918 (30%)        |
| B*54:01    | 828                       | 243 (29%)        |
| A*36:01    | 2,292                     | 588 (26%)        |
| A*68:02    | 1,584                     | 369 (23%)        |
| C*02:02    | 1,088                     | 216 (20%)        |

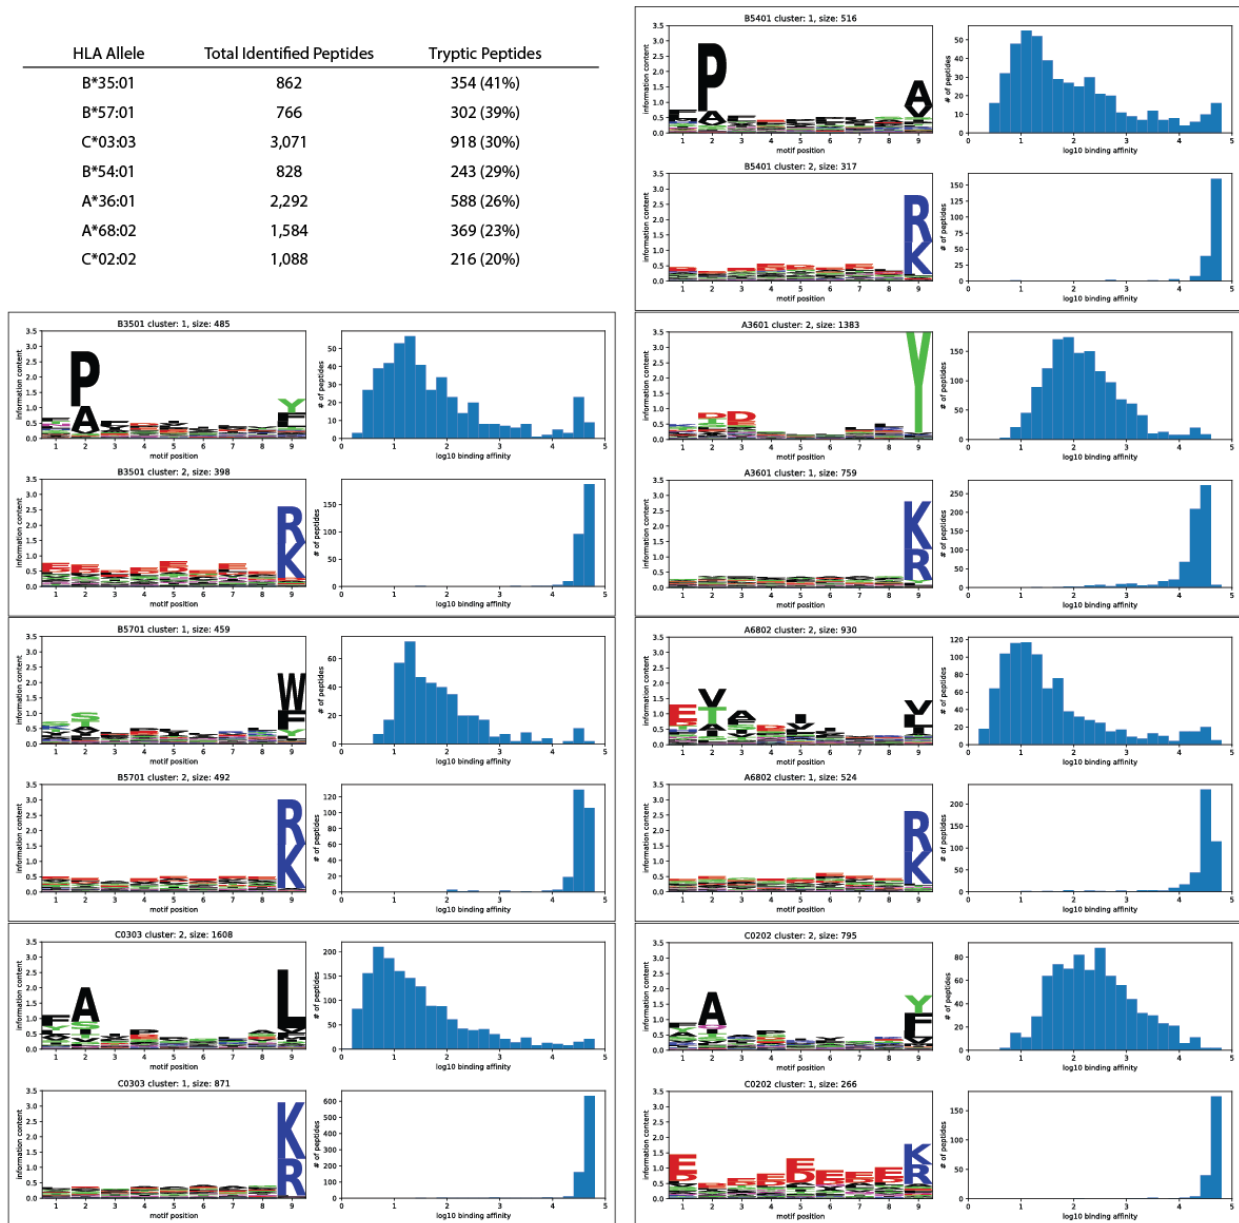

**Supplementary Figure 1 – Extents of tryptic peptide contaminations in HLA peptidomics data.** Data for the top 7 alleles with more than 20% contaminations are shown. The table lists the numbers of all identified peptides and tryptic peptides for each allele. Each boxed region contains the 9-mer motif profiles and distributions of predicted binding affinity for each allele, sorted in the same order as shown in the table from left to right.

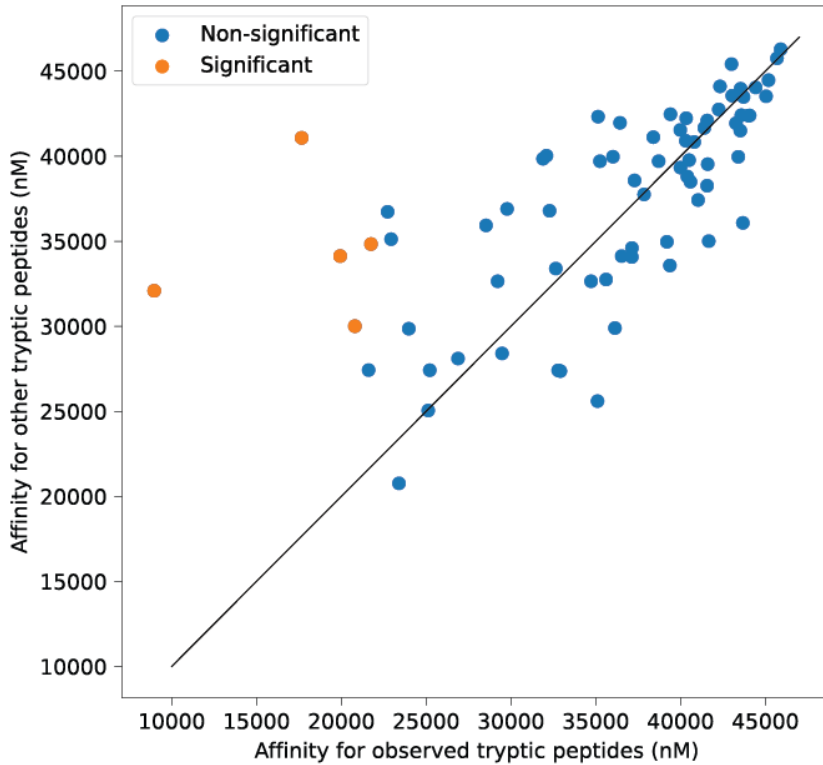

**Supplementary Figure 2 – HLA alleles do not exhibit stronger affinities toward observed tryptic peptides than toward random tryptic peptides.** Scatter plot shows the median predicted binding affinity (IC<sub>50</sub>, nM unit) between observed tryptic peptide-HLA allele pairs (x-axis) and that between random tryptic peptide-HLA pairs. Each data point represents one HLA allele. Higher IC<sub>50</sub> value indicates lower affinity. Random tryptic peptides were selected from observed tryptic peptides in peptidomics data of all HLA alleles. Orange data points indicate the few HLA alleles that exhibit significantly stronger affinities toward tryptic peptides identified from the corresponding peptidomics data (Benjamini-Hochberg adjusted Mann-Whitney U test p-value < 0.05).

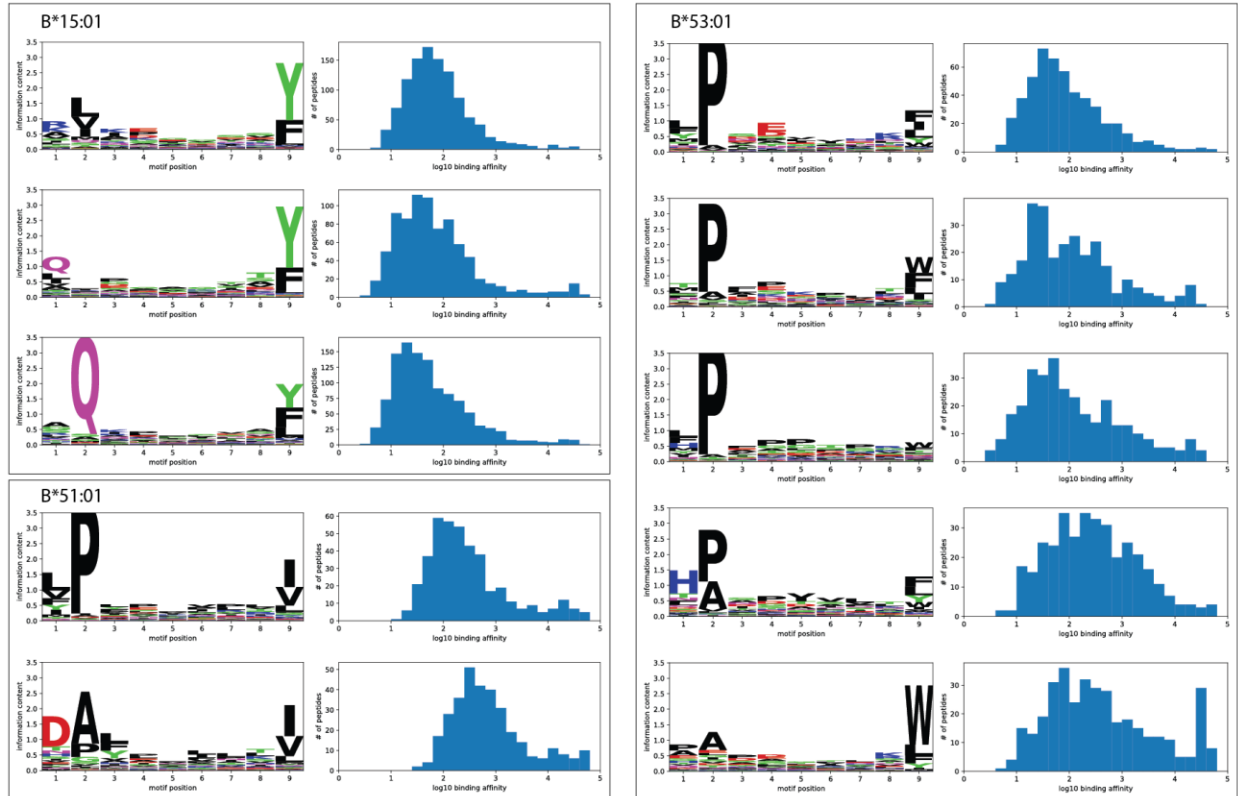

**Supplementary Figure 3 – HLA alleles with multiple, clearly distinct motif specificities.** Each boxed region contains motifs of the indicated HLA allele. Each 9-mer motif is shown alongside the distribution of predicted binding affinity (IC<sub>50</sub>, nM unit).

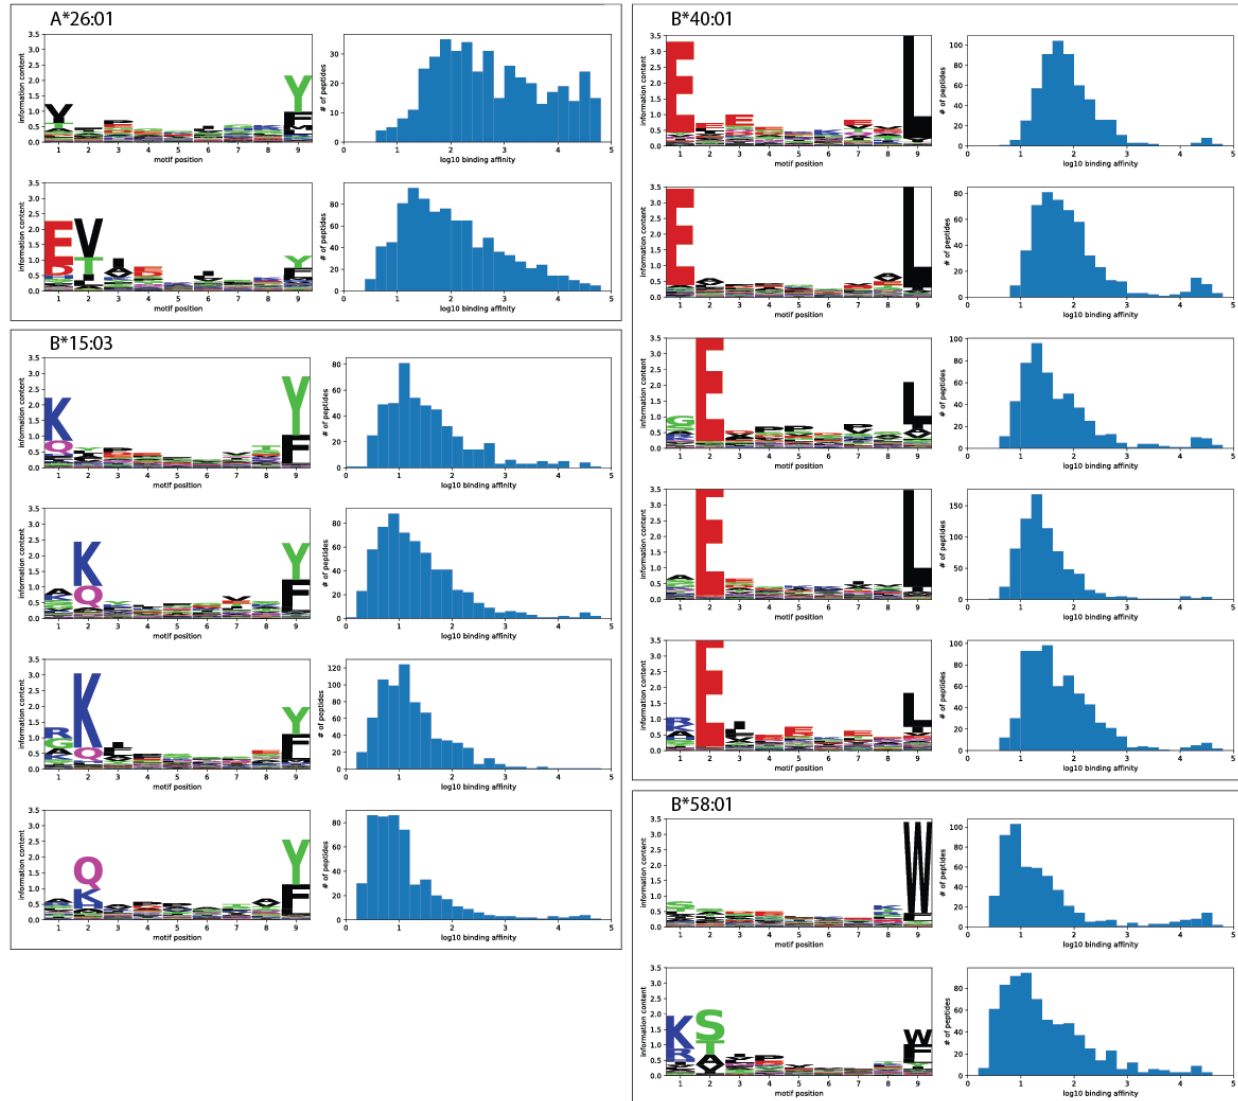

**Supplementary Figure 4 – HLA alleles with multiple related motif specificities.** Each boxed region contains motifs of the indicated HLA allele. Each 9-mer motif is shown alongside the distribution of predicted binding affinity (IC50, nM unit). These motifs possess similar anchor residues at the 2<sup>nd</sup> position or shifted to the 1<sup>st</sup> position.
